# Supplementary material
Source: MDPI journal article supplement (https://www.mdpi.com/2073-445X/12/5/940)
Supplement: s1 [file s1]

## Supplementary Material, Kumm and Hessele, Land

**Table S1.**

Areas of agricultural land and forest grazing, number of cattle and cattle herds, and number of sheep, goats and horses (1000s of hectares and heads) in Sweden in 1901, 1927 (approximately when the area of arable land was largest), 1951 (when the fastest reduction of agriculture land, cattle and horses began), 1968 (when the fastest reduction of agriculture land, cattle and horses ended), 1995 (Sweden's entry into the EU) and 2022.

|                             | 1901             | 1927             | 1951               | 1968             | 1995  | 2022            |
|-----------------------------|------------------|------------------|--------------------|------------------|-------|-----------------|
| Arable land                 | 3 540            | 3 716            | 3 647              | 3 011            | 2 767 | 2 538           |
| Semi-natural pasture        | 1 432            | 742              | 724 <sup>1</sup>   | 377 <sup>2</sup> | 425   | 417             |
| Hay meadow                  |                  | 526              |                    |                  |       | 18              |
| Forest grazing              |                  | 752              |                    |                  |       | 29 <sup>3</sup> |
| Total excl. forest grazing  | 4 972            | 4 984            | 4 361              | 3 388            | 3 192 | 2 973           |
| Total incl. forest grazing  |                  | 5 736            |                    |                  |       | 3 002           |
| Cattle incl. calves         | 2 594            | 2 899            | 2 452              | 2 065            | 1 777 | 1 449           |
| Of which dairy cows         |                  |                  | 1 586 <sup>4</sup> | 723 <sup>4</sup> | 482   | 297             |
| Of which suckler cows       |                  |                  |                    | 40 <sup>4</sup>  | 157   | 213             |
| Cattle herds                | 508 <sup>5</sup> | 427 <sup>5</sup> | 307                | 126 <sup>6</sup> | 42    | 15              |
| Cattle/herd                 | 5                | 7                | 8                  | 16               | 42    | 97              |
| Sheep (adult ewes and rams) | 651 <sup>7</sup> | 444              | 124                | 145              | 195   | 264             |
| Goats                       | 66               | 55               | 7                  | 3 <sup>8</sup>   |       |                 |
| Horses                      | 539              | 633              | 404 <sup>9</sup>   | 69               | 83    | 355             |

Source: [21] when no other source is indicated below

<sup>1</sup>Culture pasture (189) + semi-natural grassland (535)

<sup>2</sup>1970

<sup>3</sup>Including grazing at summer farms

<sup>4</sup>[18]

<sup>5</sup>Total number of farms of which nearly all had cattle at the beginning of the 1900s (in 1951, when cattleless farms had started to become common, out of a total of 378,000 farms, 308,000 had cattle)

<sup>6</sup>Average for 1966 and 1970

<sup>7</sup>Estimated based on the number sheep incl. lambs

<sup>8</sup>1990

<sup>9</sup>1956

**Figure S1.**

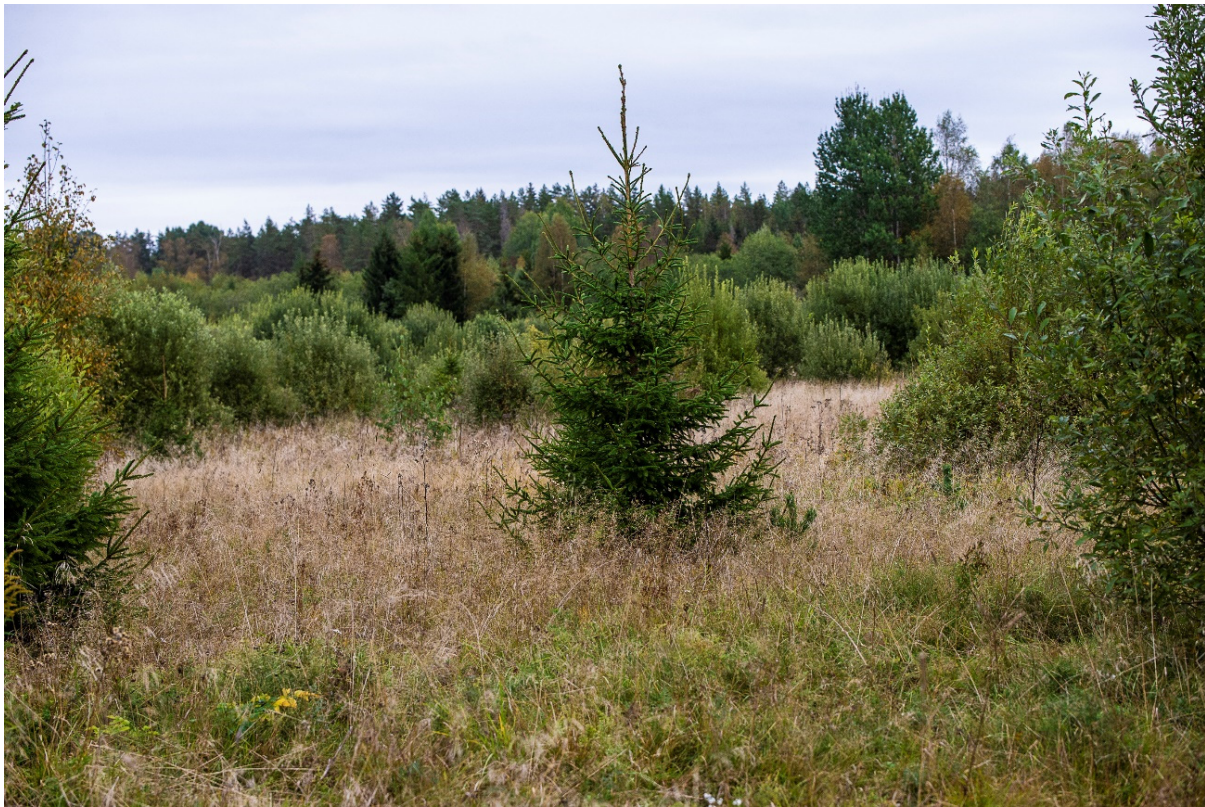

Example suggesting that natural afforestation of abandoned agricultural land can take a long time and produce patchy low-producing low-quality forest. The field in the picture taken in 2021 had not been cultivated since the 1990s. A large part of the land is only thick unused grass where it is difficult for tree seedlings to establish. Such lands can be converted to silvipastoral agroforestry through thinning and grazing. In doing so, the landscape becomes more appealing and beef or lamb production is rewarded at the same time that the value of timber production is just as high if the most valuable trees are preserved.

Photo: Mari Nälsén.

**Figure S2.**

Valuation of landscapes by 8 surveys with online panels consisting of randomly selected Swedes aged 18-75 [37]. Years 2014-2021.

**2014.** Suppose that the white house is your residence. A small plot belongs to the house, but the surrounding land is owned by a farmer. Rank the four surrounding land use options from best to worst with consideration to your living environment.

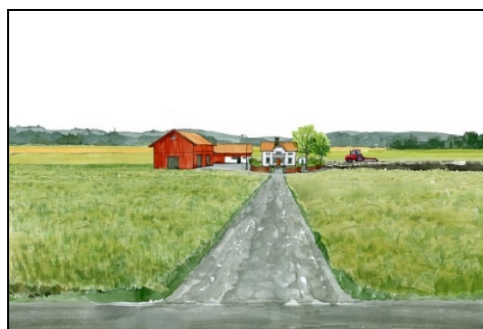

Arable land

| Best % | Second best % | Second worst % | Worst % |
|--------|---------------|----------------|---------|
| 10     | 15            | 33             | 42      |

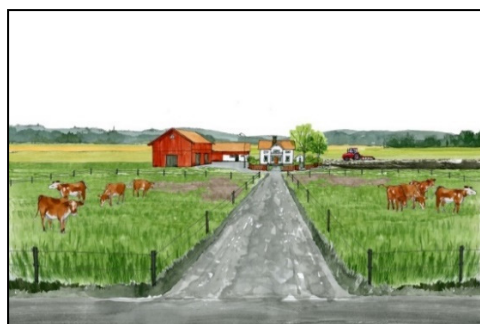

Treeless pasture

|    |    |    |    |
|----|----|----|----|
| 19 | 36 | 30 | 15 |
|----|----|----|----|

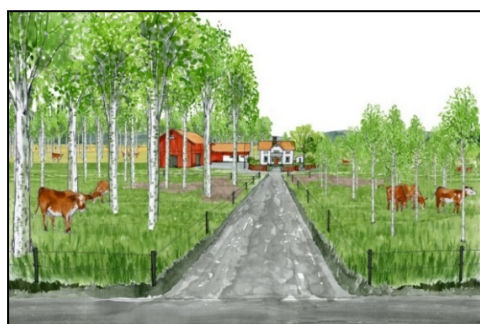

Silvipastoral agroforestry

|    |    |    |   |
|----|----|----|---|
| 49 | 29 | 16 | 6 |
|----|----|----|---|

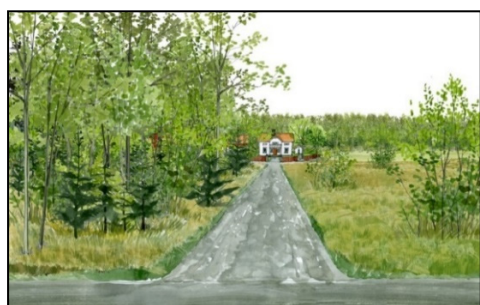

Natural afforestation

|    |    |    |    |
|----|----|----|----|
| 23 | 20 | 21 | 37 |
|----|----|----|----|

Source: Web-based survey with 1,000 responding persons from TNS Sifo's online panel [37] consisting of randomly selected Swedes aged 18-75. June 2014.



2016. Suppose that you live or often travel overlooking these landscapes. Evaluate the five options on a five-point scale from Low value = 1 to High value = 5 based on your preferences.

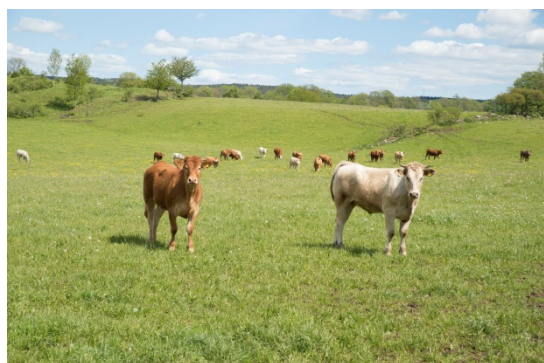

Treeless pasture

---

Score on 5-point scale where 5 is best

---

3.8

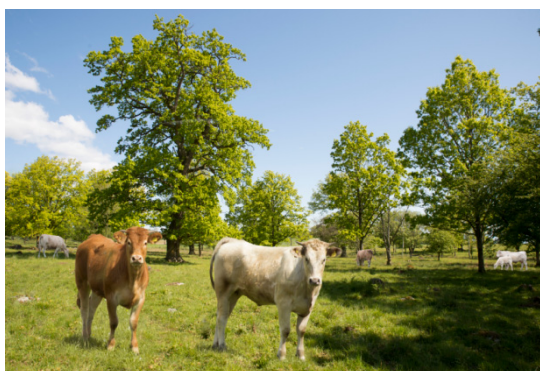

Silvipastoral agroforestry with old oaks

4.5

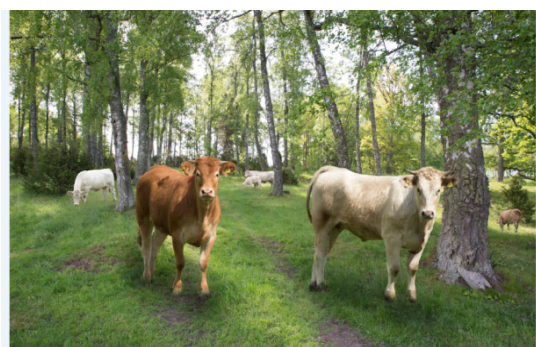

Silvipastoral agroforestry with old birches

4.3

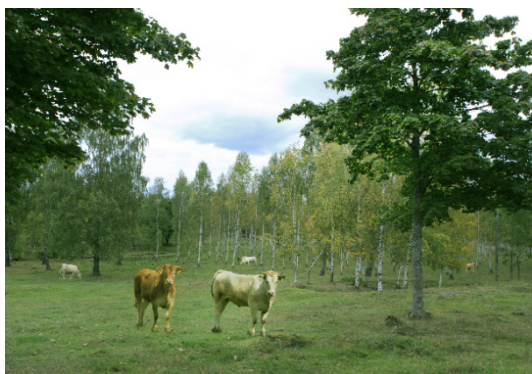

Silvipastoral agroforestry with young oaks and birches

3.9

---

Source: Web-based survey with 1,000 responding persons from TNS Sifo's online panel [37] consisting of randomly selected Swedes aged 18-75. November 2016.

**2019:1.** Suppose that you live or often travel overlooking these landscapes. Rank the five landscapes from the best to the worst based on your preferences.

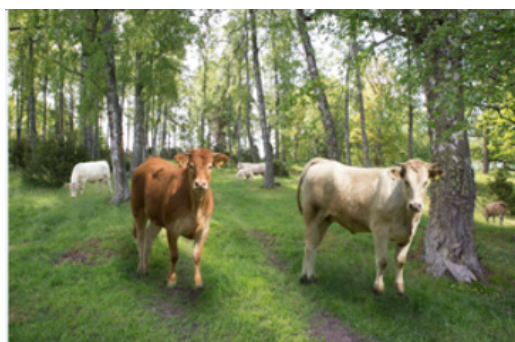

Silvipastoral agroforestry with old birches

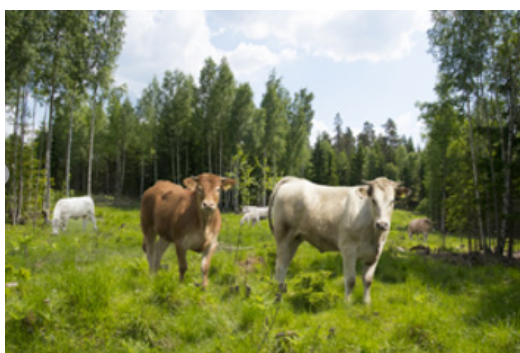

Silvipastoral agroforestry with birch groves

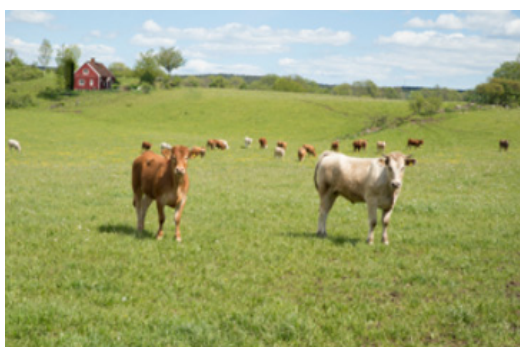

Treeless pasture

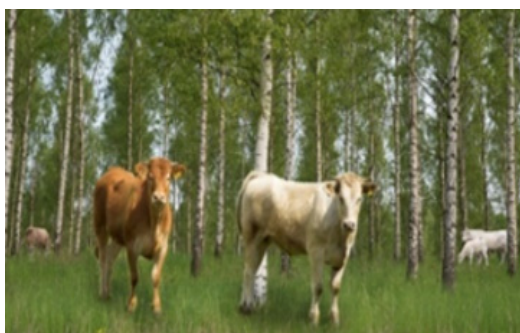

Silvipastoral agroforestry with planted birch

| Best % | Second best % | Second worst % | Worst % |
|--------|---------------|----------------|---------|
| 46     | 29            | 19             | 7       |
| 28     | 44            | 21             | 7       |
| 20     | 12            | 21             | 46      |
| 5      | 15            | 39             | 40      |

Source: Web-based survey with 1,000 responding persons from TNS Sifo's online panel [37] consisting of randomly selected Swedes aged 18-75. October 2019.

**2019:2.** Suppose that you live or often travel overlooking these landscapes. Rank the five landscapes from the best to the worst based on your preferences.

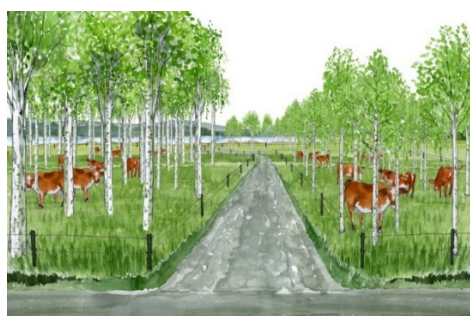

Silvipastoral agroforestry

| Best or second best % | Worst or second worst % |
|-----------------------|-------------------------|
|-----------------------|-------------------------|

34

11

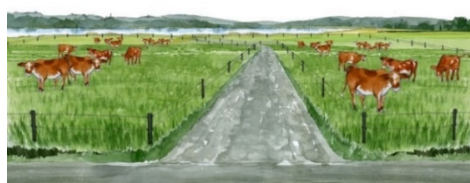

Treeless pasture

31

12

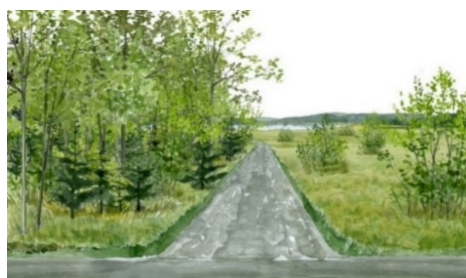

Natural forest regeneration

19

20

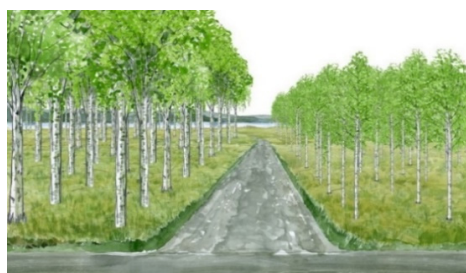

Birch planting

11

23

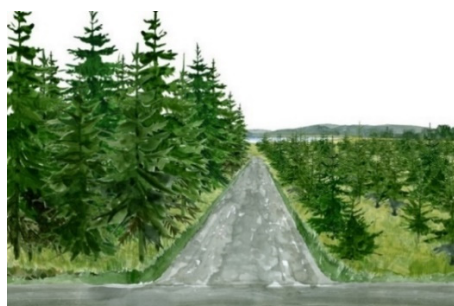

Spruce planting

6

38

Source: Web-based survey with 1,000 responding persons from TNS Sifo's online panel [37] consisting of randomly selected Swedes aged 18-75. October 2019.



**2021:1.** Suppose that you live or often travel overlooking these landscapes. Rank the three landscapes from the best to the worst based on your preferences. Half of the respondents received the following climate-related additional information: "When the trees in the pasture grow, they absorb carbon dioxide, which climate compensates for parts of the livestock's greenhouse gas emissions".

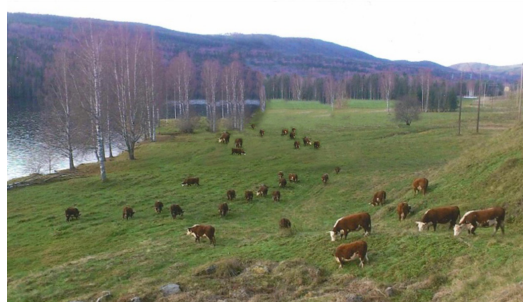

Treeless pasture

| Without climate information |               |         | With climate information |               |         |
|-----------------------------|---------------|---------|--------------------------|---------------|---------|
| Best %                      | Second best % | Worst % | Best %                   | Second best % | Worst % |
| 41                          | 19            | 40      | 20                       | 17            | 63      |

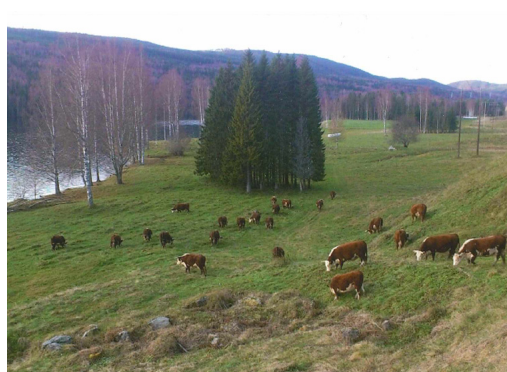

Silvipastoral agroforestry with a spruce grove

|    |    |   |    |    |   |
|----|----|---|----|----|---|
| 27 | 66 | 8 | 26 | 70 | 4 |
|----|----|---|----|----|---|

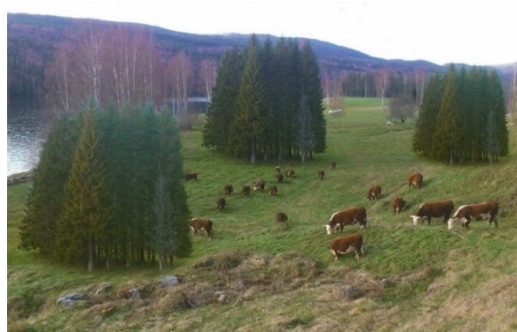

Silvipastoral agroforestry with two spruce groves

|    |    |    |           |    |    |
|----|----|----|-----------|----|----|
| 33 | 15 | 52 | <b>54</b> | 13 | 33 |
|----|----|----|-----------|----|----|

Source: Web-based survey with 1,000 responding persons from TNS Sifo's online panel [37] consisting of randomly selected Swedes aged 18-75. November 2021.

**2021:2.** Suppose that you live or often travel overlooking these landscapes. Rank the two landscapes from the best to the worst based on your preferences. Half of the respondents received the following climate-related additional information: "When the trees in the pasture grow, they absorb carbon dioxide, which climate compensates for parts of the livestock's greenhouse gas emissions".

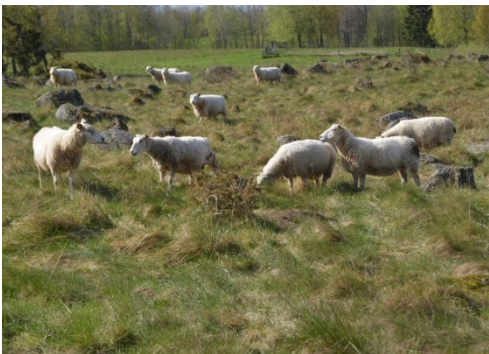

Treeless pasture

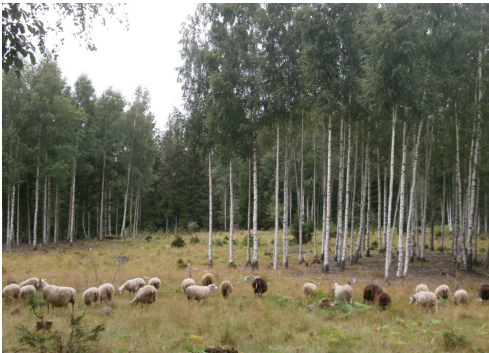

Silvipastoral agroforestry with birch groves

| Without climate information |         | With climate information |         |
|-----------------------------|---------|--------------------------|---------|
| Best %                      | Worst % | Best %                   | Worst % |
| 27                          | 73      | 15                       | 85      |
| 73                          | 27      | 85                       | 15      |

Source: Web-based survey with 1,000 responding persons from TNS Sifo’s online panel [37] consisting of randomly selected Swedes aged 18-75. November 2021.



**Figure S3.**

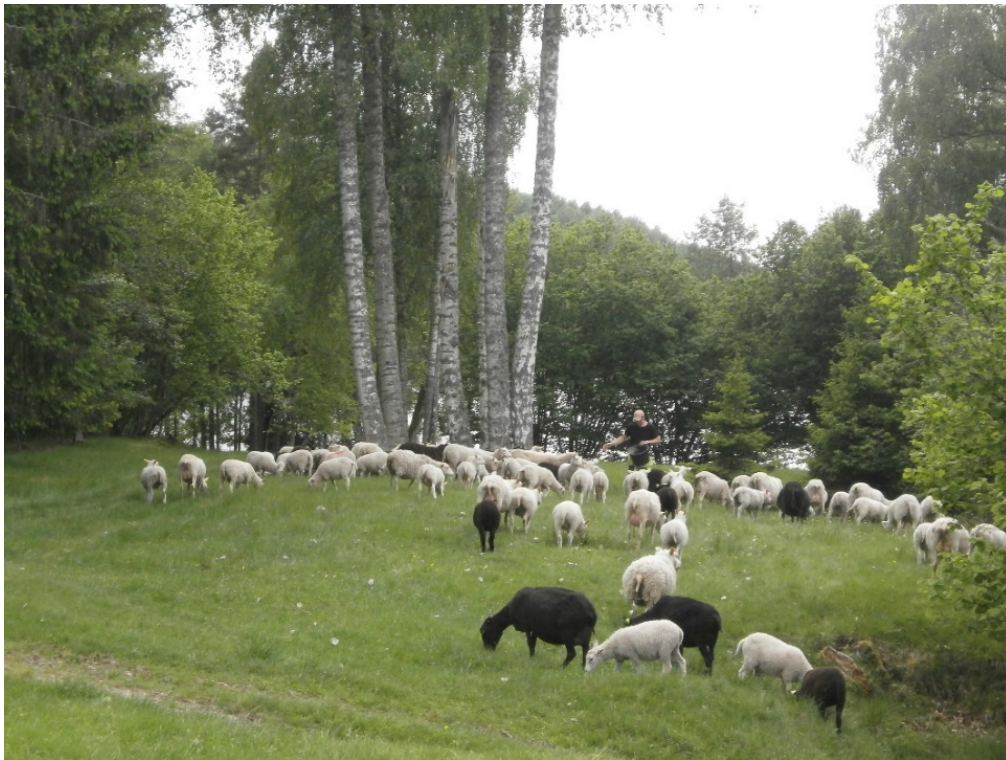

Silvopastoral agroforestry with birch grove that was left behind when overgrown farmland was restored to pasture 40 years ago when the then dense self-seeded birch forest was 20 years old.

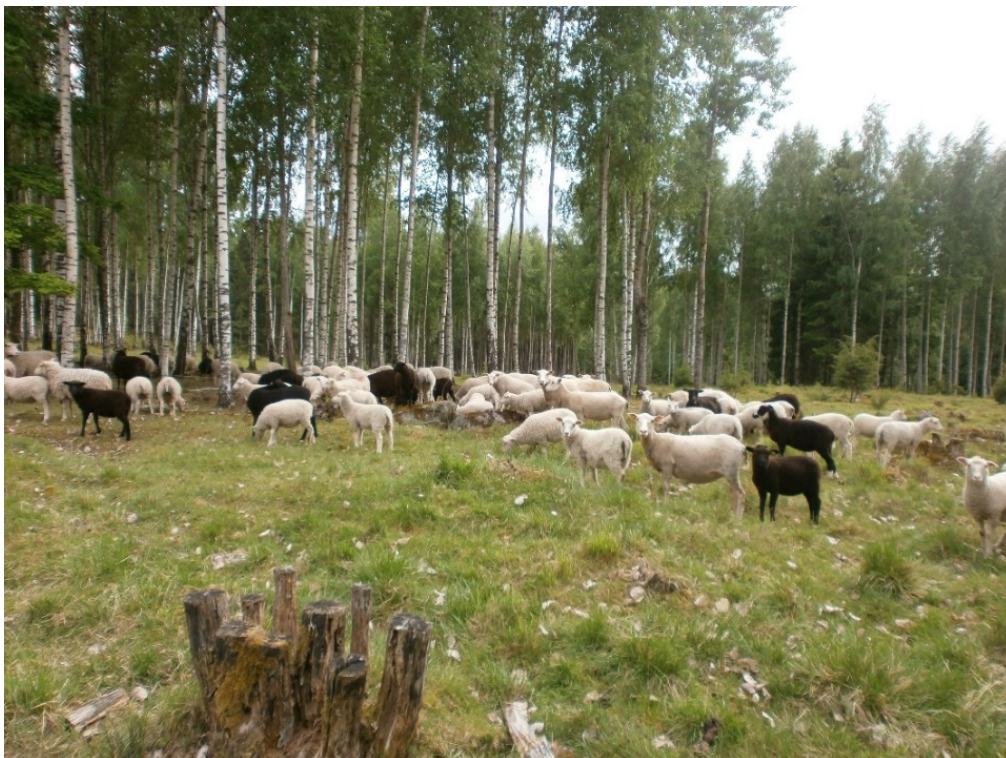

Silvopastoral agroforestry with self-seeded birch groves on land that was grazed forest until the 1950s and was finally felled in the 1990s, after which it became self-sown dense birch-dominated young forest. This was mechanically corridor cleared at the age of 15 after which grazing started. The left-over groves were thinned after 5 years to provide more pasture and faster value growth of the left-over trees.
